# Supplementary material
Source: publisher figshare collection journal article supplement (https://rs.figshare.com/ndownloader/files/17535026)
Supplement: Supplementary file 1 [file 17535026]

## Sheet: Synaesthetes
Synaesthetic colour associations for Japanese Kanji characters: From the perspective of grapheme learning (Asano, Takahashi, Tsushiro, & Yokosawa)
Study 1 raw data and CIE L*a*b* coordinates
Synaesthetes (N = 16)						Syn 1					Syn 2					Syn 3					Syn 4					Syn 5					Syn 6					Syn 7					Syn 8					Syn 9
#	Antonym Pair #	Kanji	Meaning	Grade		Colour	L*	a*	b*		Colour	L*	a*	b*		Colour	L*	a*	b*		Colour	L*	a*	b*		Colour	L*	a*	b*		Colour	L*	a*	b*		Colour	L*	a*	b*		Colour	L*	a*	b*		Colour	L*	a*	b*
1	1	上	up	1		#FF0000	46.3517	63.5082	70.8424		#1E90FF	48.6856	-6.47527	-51.5238		#FA8072	54.6058	39.7528	36.6284		#CD5C5C	41.548	40.321	29.4546		#B22222	31.1304	46.0802	48.1965		#8B4513	25.1619	28.3096	41.3423		#87CEFA	66.5886	-22.8658	-19.5932		#F0E68C	75.3579	-12.9277	51.4321		#000000	0.997234	-0.0295737	0.225159
2	1	下	down	1		#708090	38.2874	-3.53683	-7.33268		#BC8F8F	50.7106	14.1354	12.3561		#ADD8E6	69.923	-20.5468	-3.82205		#FFEFD5	80.9053	-7.61916	22.4124		#1E90FF	48.6856	-6.47527	-51.5238		#FAFFFF	85.2	-12.7615	7.76606		#808000	36.5876	-8.26467	54.4563		#FDF5E6	82.6789	-9.72778	16.3829		#FFFAFA	87.0312	-10.5101	11.5396
3	2	右	right	1		#FF6347	50.358	52.1791	55.2532		#FA8072	54.6058	39.7528	36.6284		#228B22	34.4431	-49.5638	48.3827		#FF69B4	53.75	53.4818	-2.56666		#FFC0CB	69.5122	15.8496	9.45721		#FA8072	54.6058	39.7528	36.6284		#FF69B4	53.75	53.4818	-2.56666		#7FFFD4	77.1791	-51.2179	16.0045		#ADD8E6	69.923	-20.5468	-3.82205
4	2	左	left	1		#87CEEB	65.7331	-25.5432	-13.2354		#90EE90	71.1527	-49.1796	42.7212		#FFD700	71.893	-1.98598	88.9065		#4682B4	39.1048	-11.2746	-26.9356		#B8860B	44.8996	13.7593	64.337		#FFFFE0	84.7715	-14.1511	22.6039		#90EE90	71.1527	-49.1796	42.7212		#00FF7F	72.9511	-75.8178	53.3128		#9932CC	36.6252	40.4498	-44.3274
5	3	大	large	1		#000000	0.997234	-0.0295737	0.225159		#DC143C	39.1904	55.3387	48.3634		#000000	0.997234	-0.0295737	0.225159		#FFFAFA	87.0312	-10.5101	11.5396		#D2691E	43.0332	38.2083	63.0975		#8B0000	22.9475	36.0874	38.8733		#556B2F	26.0662	-11.5018	17.1104		#F0E68C	75.3579	-12.9277	51.4321		#000000	0.997234	-0.0295737	0.225159
6	3	小	small	1		#FAFAD2	82.743	-13.9583	25.9684		#FFC0CB	69.5122	15.8496	9.45721		#B0E0E6	72.0544	-23.4601	-0.453468		#FFFAFA	87.0312	-10.5101	11.5396		#FFFAFA	87.0312	-10.5101	11.5396		#E0FFFF	83.537	-20.9624	4.94098		#FAFFFF	85.2	-12.7615	7.76606		#FAF0E6	81.4398	-8.44551	14.501		#FFFAFA	87.0312	-10.5101	11.5396
7	4	男	man	1		#191970	9.98444	2.37775	-32.8712		#1E90FF	48.6856	-6.47527	-51.5238		#00008B	14.5518	11.9992	-42.9881		#2F4F4F	14.8882	-6.92627	0.683732		#000000	0.997234	-0.0295737	0.225159		#000000	0.997234	-0.0295737	0.225159		#000000	0.997234	-0.0295737	0.225159		#2F4F4F	14.8882	-6.92627	0.683732		#191970	9.98444	2.37775	-32.8712
8	4	女	woman	1		#DC143C	39.1904	55.3387	48.3634		#BC8F8F	50.7106	14.1354	12.3561		#DB7093	47.688	39.6582	6.89309		#CD5C5C	41.548	40.321	29.4546		#FF1493	48.323	65.0038	7.84701		#696969	31.7339	-0.632134	3.86271		#DC143C	39.1904	55.3387	48.3634		#DC143C	39.1904	55.3387	48.3634		#DC143C	39.1904	55.3387	48.3634
9	5	天	heaven	1		#FFD700	71.893	-1.98598	88.9065		#FAF0E6	81.4398	-8.44551	14.501		#FFFAFA	87.0312	-10.5101	11.5396		#FFFACD	82.9984	-12.6094	28.9678		#FAF0E6	81.4398	-8.44551	14.501		#F0F8FF	82.8868	-12.6093	4.03951		#FFFF00	81.3575	-21.4548	96.6845		#F0E68C	75.3579	-12.9277	51.4321		#E0FFFF	83.537	-20.9624	4.94098
10	5	地	earth	2		#556B2F	26.0662	-11.5018	17.1104		#A0522D	31.1538	30.8316	43.6932		#808000	36.5876	-8.26467	54.4563		#800000	20.5689	32.5293	35.2359		#808000	36.5876	-8.26467	54.4563		#B8860B	44.8996	13.7593	64.337		#000000	0.997234	-0.0295737	0.225159		#8B4513	25.1619	28.3096	41.3423		#696969	31.7339	-0.632134	3.86271
11	6	朝	morning	2		#F0E68C	75.3579	-12.9277	51.4321		#000000	0.997234	-0.0295737	0.225159		#FFFACD	82.9984	-12.6094	28.9678		#DC143C	39.1904	55.3387	48.3634		#DB7093	47.688	39.6582	6.89309		#FFE4E1	79.2596	-1.55841	13.6295		#FFF8DC	83.0462	-11.1408	22.1261		#00BFFF	60.4002	-29.8128	-32.2501		#DC143C	39.1904	55.3387	48.3634
12	6	夕	evening	1		#D2691E	43.0332	38.2083	63.0975		#DAA520	56.2277	10.8581	73.4514		#FF8C00	55.9574	35.705	76.8097		#CD5C5C	41.548	40.321	29.4546		#F4A460	59.9609	20.6214	53.3803		#FFE4B5	77.3585	-4.56802	33.7633		#00008B	14.5518	11.9992	-42.9881		#48D1CC	62.894	-43.6837	-2.00929		#FF7F50	54.2597	42.3519	55.019
13	7	前	front	2		#FFB6C1	67.0438	20.0549	10.9906		#EEE8AA	76.4361	-12.8496	37.1633		#228B22	34.4431	-49.5638	48.3827		#00FF7F	72.9511	-75.8178	53.3128		#DC143C	39.1904	55.3387	48.3634		#E9967A	56.5257	25.1724	34.5081		#008B8B	37.5338	-34.3626	-5.20202		#FF6347	50.358	52.1791	55.2532		#FF4500	47.3008	59.5017	71.3469
14	7	後	back	2		#000000	0.997234	-0.0295737	0.225159		#4682B4	39.1048	-11.2746	-26.9356		#00008B	14.5518	11.9992	-42.9881		#483D8B	19.7288	16.6238	-34.4359		#191970	9.98444	2.37775	-32.8712		#2F4F4F	14.8882	-6.92627	0.683732		#000000	0.997234	-0.0295737	0.225159		#00008B	14.5518	11.9992	-42.9881		#483D8B	19.7288	16.6238	-34.4359
15	8	東	east	2		#4169E1	37.7165	11.2656	-54.3577		#556B2F	26.0662	-11.5018	17.1104		#FFD700	71.893	-1.98598	88.9065		#228B22	34.4431	-49.5638	48.3827		#191970	9.98444	2.37775	-32.8712		#EEE8AA	76.4361	-12.8496	37.1633		#0000CD	26.3002	21.4292	-62.3549		#FFD700	71.893	-1.98598	88.9065		#191970	9.98444	2.37775	-32.8712
16	8	西	west	2		#FFD700	71.893	-1.98598	88.9065		#FFD700	71.893	-1.98598	88.9065		#00FFFF	77.3943	-58.2714	-5.09969		#F4A460	59.9609	20.6214	53.3803		#F08080	53.7287	39.2113	26.0244		#FF8C00	55.9574	35.705	76.8097		#FA8072	54.6058	39.7528	36.6284		#FF7F50	54.2597	42.3519	55.019		#EEE8AA	76.4361	-12.8496	37.1633
17	9	南	south	2		#B22222	31.1304	46.0802	48.1965		#0000CD	26.3002	21.4292	-62.3549		#0000CD	26.3002	21.4292	-62.3549		#0000FF	34.5858	25.3569	-75.0719		#DC143C	39.1904	55.3387	48.3634		#FFD700	71.893	-1.98598	88.9065		#87CEFA	66.5886	-22.8658	-19.5932		#40E0D0	67.1116	-51.7792	3.11538		#C71585	37.6063	51.904	-1.03507
18	9	北	north	2		#FFFFFF	88.2566	-12.3333	11.0834		#D8BFD8	66.2439	5.75064	-2.73763		#00FFFF	77.3943	-58.2714	-5.09969		#FFFF00	81.3575	-21.4548	96.6845		#FFFAFA	87.0312	-10.5101	11.5396		#F0E68C	75.3579	-12.9277	51.4321		#DC143C	39.1904	55.3387	48.3634		#B0E0E6	72.0544	-23.4601	-0.453468		#F5F5DC	81.6039	-13.1352	19.8325
19	10	強	strong	2		#800000	20.5689	32.5293	35.2359		#800000	20.5689	32.5293	35.2359		#000000	0.997234	-0.0295737	0.225159		#483D8B	19.7288	16.6238	-34.4359		#DC143C	39.1904	55.3387	48.3634		#A0522D	31.1538	30.8316	43.6932		#191970	9.98444	2.37775	-32.8712		#F4A460	59.9609	20.6214	53.3803		#FFA500	60.6933	24.0739	80.1479
20	10	弱	weak	2		#FFFFE0	84.7715	-14.1511	22.6039		#87CEFA	66.5886	-22.8658	-19.5932		#ADD8E6	69.923	-20.5468	-3.82205		#FFB6C1	67.0438	20.0549	10.9906		#87CEFA	66.5886	-22.8658	-19.5932		#F0F8FF	82.8868	-12.6093	4.03951		#483D8B	19.7288	16.6238	-34.4359		#87CEEB	65.7331	-25.5432	-13.2354		#F4A460	59.9609	20.6214	53.3803
21	11	春	spring	2		#FFB6C1	67.0438	20.0549	10.9906		#FFE4E1	79.2596	-1.55841	13.6295		#DB7093	47.688	39.6582	6.89309		#FFC0CB	69.5122	15.8496	9.45721		#F08080	53.7287	39.2113	26.0244		#FFC0CB	69.5122	15.8496	9.45721		#FFD700	71.893	-1.98598	88.9065		#FFB6C1	67.0438	20.0549	10.9906		#FF69B4	53.75	53.4818	-2.56666
22	11	秋	autumn	2		#A0522D	31.1538	30.8316	43.6932		#A0522D	31.1538	30.8316	43.6932		#DAA520	56.2277	10.8581	73.4514		#FF8C00	55.9574	35.705	76.8097		#B8860B	44.8996	13.7593	64.337		#FFE4B5	77.3585	-4.56802	33.7633		#A0522D	31.1538	30.8316	43.6932		#FFA500	60.6933	24.0739	80.1479		#F4A460	59.9609	20.6214	53.3803
23	12	夏	summer	2		#FFA500	60.6933	24.0739	80.1479		#00008B	14.5518	11.9992	-42.9881		#FFA500	60.6933	24.0739	80.1479		#FFFF00	81.3575	-21.4548	96.6845		#FFA500	60.6933	24.0739	80.1479		#B0C4DE	64.7557	-9.41706	-8.29205		#FFA500	60.6933	24.0739	80.1479		#7FFF00	73.9525	-65.9581	87.1469		#4B0082	17.1269	18.9264	-32.91
24	12	冬	winter	2		#F8F8FF	83.3318	-9.99841	4.75805		#ADD8E6	69.923	-20.5468	-3.82205		#ADD8E6	69.923	-20.5468	-3.82205		#DCDCDC	76.1796	-10.782	9.84554		#FFFAFA	87.0312	-10.5101	11.5396		#B0E0E6	72.0544	-23.4601	-0.453468		#E0FFFF	83.537	-20.9624	4.94098		#B0E0E6	72.0544	-23.4601	-0.453468		#FFFAFA	87.0312	-10.5101	11.5396
25	13	昼	day	2		#FFD700	71.893	-1.98598	88.9065		#FFE4B5	77.3585	-4.56802	33.7633		#F0E68C	75.3579	-12.9277	51.4321		#F0E68C	75.3579	-12.9277	51.4321		#FFFF00	81.3575	-21.4548	96.6845		#FFFACD	82.9984	-12.6094	28.9678		#FFA500	60.6933	24.0739	80.1479		#FFFACD	82.9984	-12.6094	28.9678		#F4A460	59.9609	20.6214	53.3803
26	13	夜	night	2		#000000	0.997234	-0.0295737	0.225159		#483D8B	19.7288	16.6238	-34.4359		#000080	13.0216	7.86157	-39.8492		#191970	9.98444	2.37775	-32.8712		#000080	13.0216	7.86157	-39.8492		#DAA520	56.2277	10.8581	73.4514		#00008B	14.5518	11.9992	-42.9881		#778899	41.5322	-6.5683	-7.01183		#4B0082	17.1269	18.9264	-32.91
27	14	生	alive	1		#FFFAFA	87.0312	-10.5101	11.5396		#7FFFD4	77.1791	-51.2179	16.0045		#FFE4B5	77.3585	-4.56802	33.7633		#F0E68C	75.3579	-12.9277	51.4321		#FFFACD	82.9984	-12.6094	28.9678		#E6E6FA	77.81	-7.79844	-1.53183		#7FFF00	73.9525	-65.9581	87.1469		#F0E68C	75.3579	-12.9277	51.4321		#FFE4B5	77.3585	-4.56802	33.7633
28	14	死	dead	3		#000000	0.997234	-0.0295737	0.225159		#2F4F4F	14.8882	-6.92627	0.683732		#000000	0.997234	-0.0295737	0.225159		#000000	0.997234	-0.0295737	0.225159		#9400D3	36.4556	40.7674	-48.5466		#F8F8FF	83.3318	-9.99841	4.75805		#191970	9.98444	2.37775	-32.8712		#2F4F4F	14.8882	-6.92627	0.683732		#FFFAFA	87.0312	-10.5101	11.5396
29	15	丸	round	2		#A0522D	31.1538	30.8316	43.6932		#4B0082	17.1269	18.9264	-32.91		#DC143C	39.1904	55.3387	48.3634		#8B4513	25.1619	28.3096	41.3423		#DC143C	39.1904	55.3387	48.3634		#F5DEB3	75.0577	-5.45616	31.4243		#000000	0.997234	-0.0295737	0.225159		#FF4500	47.3008	59.5017	71.3469		#DC143C	39.1904	55.3387	48.3634
30	15	角	anbular	2		#DC143C	39.1904	55.3387	48.3634		#808000	36.5876	-8.26467	54.4563		#FFD700	71.893	-1.98598	88.9065		#008000	30.1693	-49.9461	45.5971		#0000FF	34.5858	25.3569	-75.0719		#FFFACD	82.9984	-12.6094	28.9678		#00FA9A	72.1951	-72.255	38.6622		#F0E68C	75.3579	-12.9277	51.4321		#FF0000	46.3517	63.5082	70.8424
31	16	売	sell	2		#FAFAD2	82.743	-13.9583	25.9684		#00008B	14.5518	11.9992	-42.9881		#FFD700	71.893	-1.98598	88.9065		#A0522D	31.1538	30.8316	43.6932		#FFB6C1	67.0438	20.0549	10.9906		#FFE4B5	77.3585	-4.56802	33.7633		#87CEFA	66.5886	-22.8658	-19.5932		#FFA500	60.6933	24.0739	80.1479		#00CED1	61.6628	-45.4061	-6.66954
32	16	買	buy	2		#D2691E	43.0332	38.2083	63.0975		#A0522D	31.1538	30.8316	43.6932		#B22222	31.1304	46.0802	48.1965		#008000	30.1693	-49.9461	45.5971		#EEE8AA	76.4361	-12.8496	37.1633		#2F4F4F	14.8882	-6.92627	0.683732		#CD8541	47.8032	21.3447	53.7059		#F5DEB3	75.0577	-5.45616	31.4243		#8B0000	22.9475	36.0874	38.8733
33	17	行	go	2		#800000	20.5689	32.5293	35.2359		#F0E68C	75.3579	-12.9277	51.4321		#228B22	34.4431	-49.5638	48.3827		#F0E68C	75.3579	-12.9277	51.4321		#1E90FF	48.6856	-6.47527	-51.5238		#EEE8AA	76.4361	-12.8496	37.1633		#FFFAFA	87.0312	-10.5101	11.5396		#98FB98	75.2456	-51.2723	44.4159		#FFF8DC	83.0462	-11.1408	22.1261
34	17	来	come	2		#4169E1	37.7165	11.2656	-54.3577		#228B22	34.4431	-49.5638	48.3827		#FFD700	71.893	-1.98598	88.9065		#FFFF00	81.3575	-21.4548	96.6845		#EEE8AA	76.4361	-12.8496	37.1633		#F0E68C	75.3579	-12.9277	51.4321		#DC143C	39.1904	55.3387	48.3634		#FFA500	60.6933	24.0739	80.1479		#FFE4B5	77.3585	-4.56802	33.7633
35	18	明	bright	2		#FFB6C1	67.0438	20.0549	10.9906		#FFD700	71.893	-1.98598	88.9065		#F4A460	59.9609	20.6214	53.3803		#FA8072	54.6058	39.7528	36.6284		#DC143C	39.1904	55.3387	48.3634		#BC8F8F	50.7106	14.1354	12.3561		#0000FF	34.5858	25.3569	-75.0719		#FFD700	71.893	-1.98598	88.9065		#FF6347	50.358	52.1791	55.2532
36	18	暗	dark	3		#483D8B	19.7288	16.6238	-34.4359		#2F4F4F	14.8882	-6.92627	0.683732		#191970	9.98444	2.37775	-32.8712		#800000	20.5689	32.5293	35.2359		#000000	0.997234	-0.0295737	0.225159		#E9967A	56.5257	25.1724	34.5081		#191970	9.98444	2.37775	-32.8712		#696969	31.7339	-0.632134	3.86271		#000000	0.997234	-0.0295737	0.225159
37	19	長	long	2		#8B4513	25.1619	28.3096	41.3423		#191970	9.98444	2.37775	-32.8712		#191970	9.98444	2.37775	-32.8712		#2E8B57	35.5474	-41.2884	23.3312		#800080	24.7243	33.4803	-19.0905		#5F9EA0	46.6315	-24.5639	-3.26254		#0000CD	26.3002	21.4292	-62.3549		#228B22	34.4431	-49.5638	48.3827		#9370DB	43.7996	23.7324	-40.7423
38	19	短	short	3		#CD8541	47.8032	21.3447	53.7059		#4682B4	39.1048	-11.2746	-26.9356		#008000	30.1693	-49.9461	45.5971		#FA8072	54.6058	39.7528	36.6284		#3CB371	49.882	-48.8294	28.5082		#FAFFFF	85.2	-12.7615	7.76606		#FFD700	71.893	-1.98598	88.9065		#32CD32	57.1436	-65.9743	66.9613		#AFEEEE	75.8478	-29.0759	1.36849
39	20	楽	easy, comfortable	2		#FFD700	71.893	-1.98598	88.9065		#F0E68C	75.3579	-12.9277	51.4321		#DB7093	47.688	39.6582	6.89309		#FF69B4	53.75	53.4818	-2.56666		#FFC0CB	69.5122	15.8496	9.45721		#808000	36.5876	-8.26467	54.4563		#FFFF00	81.3575	-21.4548	96.6845		#FF69B4	53.75	53.4818	-2.56666		#FFA500	60.6933	24.0739	80.1479
40	20	苦	hard	3		#556B2F	26.0662	-11.5018	17.1104		#6B8E23	38.9329	-25.3355	53.6066		#006400	19.4784	-24.1588	22.2376		#FAFAD2	82.743	-13.9583	25.9684		#228B22	34.4431	-49.5638	48.3827		#556B2F	26.0662	-11.5018	17.1104		#BDB76B	58.6396	-10.7942	44.9077		#228B22	34.4431	-49.5638	48.3827		#008B8B	37.5338	-34.3626	-5.20202
41	21	教	teach	2		#6B8E23	38.9329	-25.3355	53.6066		#2E8B57	35.5474	-41.2884	23.3312		#FFD700	71.893	-1.98598	88.9065		#0000FF	34.5858	25.3569	-75.0719		#000080	13.0216	7.86157	-39.8492		#FFFACD	82.9984	-12.6094	28.9678		#A0522D	31.1538	30.8316	43.6932		#FFA500	60.6933	24.0739	80.1479		#FFA500	60.6933	24.0739	80.1479
42	21	習	learn	3		#4169E1	37.7165	11.2656	-54.3577		#DEB887	62.8355	5.26992	35.7433		#E0FFFF	83.537	-20.9624	4.94098		#FFFACD	82.9984	-12.6094	28.9678		#FDF5E6	82.6789	-9.72778	16.3829		#FFE4B5	77.3585	-4.56802	33.7633		#B0C4DE	64.7557	-9.41706	-8.29205		#FF8C00	55.9574	35.705	76.8097		#D8BFD8	66.2439	5.75064	-2.73763
43	22	高	high	2		#A0522D	31.1538	30.8316	43.6932		#191970	9.98444	2.37775	-32.8712		#1E90FF	48.6856	-6.47527	-51.5238		#000080	13.0216	7.86157	-39.8492		#B22222	31.1304	46.0802	48.1965		#66CDAF	61.168	-41.8581	11.0065		#FFFF00	81.3575	-21.4548	96.6845		#FFA500	60.6933	24.0739	80.1479		#00CED1	61.6628	-45.4061	-6.66954
44	22	低	low	4		#778899	41.5322	-6.5683	-7.01183		#EEE8AA	76.4361	-12.8496	37.1633		#ADD8E6	69.923	-20.5468	-3.82205		#F0E68C	75.3579	-12.9277	51.4321		#87CEEB	65.7331	-25.5432	-13.2354		#FFEFD5	80.9053	-7.61916	22.4124		#ADD8E6	69.923	-20.5468	-3.82205		#40E0D0	67.1116	-51.7792	3.11538		#B0E0E6	72.0544	-23.4601	-0.453468
45	23	深	deep	3		#800000	20.5689	32.5293	35.2359		#006400	19.4784	-24.1588	22.2376		#006400	19.4784	-24.1588	22.2376		#D2B48C	60.8522	0.483116	30.4443		#006400	19.4784	-24.1588	22.2376		#E0FFFF	83.537	-20.9624	4.94098		#483D8B	19.7288	16.6238	-34.4359		#5F9EA0	46.6315	-24.5639	-3.26254		#D2B48C	60.8522	0.483116	30.4443
46	23	浅	shallow	4		#8FBC8F	57.1241	-25.0128	22.4475		#ADD8E6	69.923	-20.5468	-3.82205		#20B2AA	51.6217	-42.3153	-1.17966		#ADD8E6	69.923	-20.5468	-3.82205		#000000	0.997234	-0.0295737	0.225159		#8B0000	22.9475	36.0874	38.8733		#ADD8E6	69.923	-20.5468	-3.82205		#00CED1	61.6628	-45.4061	-6.66954		#FFDEAD	75.7737	-1.65291	34.7722
47	24	喜	happy	4		#DB7093	47.688	39.6582	6.89309		#CD8541	47.8032	21.3447	53.7059		#FF69B4	53.75	53.4818	-2.56666		#800000	20.5689	32.5293	35.2359		#FFA500	60.6933	24.0739	80.1479		#EEE8AA	76.4361	-12.8496	37.1633		#DC143C	39.1904	55.3387	48.3634		#FF4500	47.3008	59.5017	71.3469		#FFA500	60.6933	24.0739	80.1479
48	24	悲	sad	3		#4682B4	39.1048	-11.2746	-26.9356		#4682B4	39.1048	-11.2746	-26.9356		#0000CD	26.3002	21.4292	-62.3549		#4682B4	39.1048	-11.2746	-26.9356		#1E90FF	48.6856	-6.47527	-51.5238		#FFFACD	82.9984	-12.6094	28.9678		#DEB887	62.8355	5.26992	35.7433		#48D1CC	62.894	-43.6837	-2.00929		#B0E0E6	72.0544	-23.4601	-0.453468
49	25	新	new	2		#F0E68C	75.3579	-12.9277	51.4321		#7FFFD4	77.1791	-51.2179	16.0045		#32CD32	57.1436	-65.9743	66.9613		#FFD700	71.893	-1.98598	88.9065		#FFB6C1	67.0438	20.0549	10.9906		#E0FFFF	83.537	-20.9624	4.94098		#0000CD	26.3002	21.4292	-62.3549		#FFA500	60.6933	24.0739	80.1479		#FFFAFA	87.0312	-10.5101	11.5396
50	25	旧	old	5		#8B0000	22.9475	36.0874	38.8733		#2E8B57	35.5474	-41.2884	23.3312		#FFEBCD	79.7105	-5.65843	24.0035		#FFF8DC	83.0462	-11.1408	22.1261		#F5FFFA	84.6792	15.5974	22.2249		#FFFACD	82.9984	-12.6094	28.9678		#FFFAF0	62.8104	2.95111	36.1342		#FF7F50	54.2597	42.3519	55.019		#000000	0.997234	-0.0295737	0.225159
51	26	有	present	3		#6495ED	49.9897	-4.83736	-39.8849		#CD8541	47.8032	21.3447	53.7059		#F08080	53.7287	39.2113	26.0244		#2E8B57	35.5474	-41.2884	23.3312		#FF4500	47.3008	59.5017	71.3469		#A0522D	31.1538	30.8316	43.6932		#0000CD	26.3002	21.4292	-62.3549		#DB7093	47.688	39.6582	6.89309		#FFFAFA	87.0312	-10.5101	11.5396
52	26	無	absent	4		#000000	0.997234	-0.0295737	0.225159		#808000	36.5876	-8.26467	54.4563		#000000	0.997234	-0.0295737	0.225159		#4B0082	17.1269	18.9264	-32.91		#000000	0.997234	-0.0295737	0.225159		#A9A9A9	57.5305	-7.8791	7.03519		#6495ED	49.9897	-4.83736	-39.8849		#708090	38.2874	-3.53683	-7.33268		#708090	38.2874	-3.53683	-7.33268
53	27	公	public	2		#F0E68C	75.3579	-12.9277	51.4321		#B8860B	44.8996	13.7593	64.337		#FFD700	71.893	-1.98598	88.9065		#F0E68C	75.3579	-12.9277	51.4321		#F0E68C	75.3579	-12.9277	51.4321		#6B8E23	38.9329	-25.3355	53.6066		#FFFACD	82.9984	-12.6094	28.9678		#98FB98	75.2456	-51.2723	44.4159		#FFFACD	82.9984	-12.6094	28.9678
54	27	私	private	6		#6B8E23	38.9329	-25.3355	53.6066		#D3D3D3	72.9314	-10.3282	9.4853		#FFB6C1	67.0438	20.0549	10.9906		#FFEBCD	79.7105	-5.65843	24.0035		#F08080	53.7287	39.2113	26.0244		#FFEFD5	80.9053	-7.61916	22.4124		#FFA07A	61.1942	26.8612	41.5299		#DDA0DD	60.4448	23.2297	-14.5372		#FF8C00	55.9574	35.705	76.8097
55	28	官	government	4		#FFC0CB	69.5122	15.8496	9.45721		#808000	36.5876	-8.26467	54.4563		#0000CD	26.3002	21.4292	-62.3549		#800000	20.5689	32.5293	35.2359		#DB7093	47.688	39.6582	6.89309		#2E8B57	35.5474	-41.2884	23.3312		#87CEFA	66.5886	-22.8658	-19.5932		#EEE8AA	76.4361	-12.8496	37.1633		#000000	0.997234	-0.0295737	0.225159
56	28	民	nongovernment, private	4		#A0522D	31.1538	30.8316	43.6932		#4682B4	39.1048	-11.2746	-26.9356		#FFFAFA	87.0312	-10.5101	11.5396		#FFEFD5	80.9053	-7.61916	22.4124		#F0E68C	75.3579	-12.9277	51.4321		#FFD700	71.893	-1.98598	88.9065		#00FFFF	77.3943	-58.2714	-5.09969		#32CD32	57.1436	-65.9743	66.9613		#FF69B4	53.75	53.4818	-2.56666
57	29	得	gain	4		#800000	20.5689	32.5293	35.2359		#B8860B	44.8996	13.7593	64.337		#DC143C	39.1904	55.3387	48.3634		#228B22	34.4431	-49.5638	48.3827		#228B22	34.4431	-49.5638	48.3827		#8FBC8F	57.1241	-25.0128	22.4475		#98FB98	75.2456	-51.2723	44.4159		#FFB6C1	67.0438	20.0549	10.9906		#20B2AA	51.6217	-42.3153	-1.17966
58	29	損	loss	5		#B22222	31.1304	46.0802	48.1965		#4682B4	39.1048	-11.2746	-26.9356		#87CEEB	65.7331	-25.5432	-13.2354		#228B22	34.4431	-49.5638	48.3827		#6495ED	49.9897	-4.83736	-39.8849		#87CEEB	65.7331	-25.5432	-13.2354		#808000	36.5876	-8.26467	54.4563		#708090	38.2874	-3.53683	-7.33268		#008080	33.2667	-29.4147	-5.78034
59	30	善	virtuous	6		#778899	41.5322	-6.5683	-7.01183		#98FB98	75.2456	-51.2723	44.4159		#808000	36.5876	-8.26467	54.4563		#696969	31.7339	-0.632134	3.86271		#FF1493	48.323	65.0038	7.84701		#B8860B	44.8996	13.7593	64.337		#B8860B	44.8996	13.7593	64.337		#FF7F50	54.2597	42.3519	55.019		#DAA520	56.2277	10.8581	73.4514
60	30	悪	evil	3		#2F4F4F	14.8882	-6.92627	0.683732		#696969	31.7339	-0.632134	3.86271		#191970	9.98444	2.37775	-32.8712		#4B0082	17.1269	18.9264	-32.91		#000000	0.997234	-0.0295737	0.225159		#8B0000	22.9475	36.0874	38.8733		#191970	9.98444	2.37775	-32.8712		#2F4F4F	14.8882	-6.92627	0.683732		#4B0082	17.1269	18.9264	-32.91
61	31	貸	lend	5		#FFC0CB	69.5122	15.8496	9.45721		#4169E1	37.7165	11.2656	-54.3577		#228B22	34.4431	-49.5638	48.3827		#228B22	34.4431	-49.5638	48.3827		#FDF5E6	82.6789	-9.72778	16.3829		#3CB371	49.882	-48.8294	28.5082		#B8860B	44.8996	13.7593	64.337		#FFFACD	82.9984	-12.6094	28.9678		#A0522D	31.1538	30.8316	43.6932
62	31	借	borrow	4		#6B8E23	38.9329	-25.3355	53.6066		#87CEFA	66.5886	-22.8658	-19.5932		#BDB76B	58.6396	-10.7942	44.9077		#8B4513	25.1619	28.3096	41.3423		#800080	24.7243	33.4803	-19.0905		#CD8541	47.8032	21.3447	53.7059		#F4A460	59.9609	20.6214	53.3803		#F0E68C	75.3579	-12.9277	51.4321		#A52A2A	28.6504	42.2311	42.1005
63	32	富	rich	5		#D8BFD8	66.2439	5.75064	-2.73763		#ADD8E6	69.923	-20.5468	-3.82205		#00CED1	61.6628	-45.4061	-6.66954		#228B22	34.4431	-49.5638	48.3827		#9370DB	43.7996	23.7324	-40.7423		#F0E68C	75.3579	-12.9277	51.4321		#0000FF	34.5858	25.3569	-75.0719		#B0E0E6	72.0544	-23.4601	-0.453468		#006400	19.4784	-24.1588	22.2376
64	32	貧	poor	5		#708090	38.2874	-3.53683	-7.33268		#708090	38.2874	-3.53683	-7.33268		#008000	30.1693	-49.9461	45.5971		#3CB371	49.882	-48.8294	28.5082		#006400	19.4784	-24.1588	22.2376		#FFFACD	82.9984	-12.6094	28.9678		#4B0082	17.1269	18.9264	-32.91		#808080	41.4062	-3.02351	5.4047		#708090	38.2874	-3.53683	-7.33268
65	33	老	elderly	4		#556B2F	26.0662	-11.5018	17.1104		#6B8E23	38.9329	-25.3355	53.6066		#F5DEB3	75.0577	-5.45616	31.4243		#FFD700	71.893	-1.98598	88.9065		#778899	41.5322	-6.5683	-7.01183		#DCDCDC	76.1796	-10.782	9.84554		#808000	36.5876	-8.26467	54.4563		#FFA500	60.6933	24.0739	80.1479		#5F9EA0	46.6315	-24.5639	-3.26254
66	33	若	young	6		#9ACD32	61.0893	-36.3091	72.1816		#98FB98	75.2456	-51.2723	44.4159		#228B22	34.4431	-49.5638	48.3827		#FFFACD	82.9984	-12.6094	28.9678		#7CFC00	72.9906	-65.6963	86.2479		#90EE90	71.1527	-49.1796	42.7212		#DB7093	47.688	39.6582	6.89309		#32CD32	57.1436	-65.9743	66.9613		#F4A460	59.9609	20.6214	53.3803
67	34	送	see off	3		#708090	38.2874	-3.53683	-7.33268		#ADD8E6	69.923	-20.5468	-3.82205		#228B22	34.4431	-49.5638	48.3827		#F0E68C	75.3579	-12.9277	51.4321		#F0E68C	75.3579	-12.9277	51.4321		#AFEEEE	75.8478	-29.0759	1.36849		#CD8541	47.8032	21.3447	53.7059		#FF8C00	55.9574	35.705	76.8097		#B0E0E6	72.0544	-23.4601	-0.453468
68	34	迎	go out to meet	7		#FFD700	71.893	-1.98598	88.9065		#DEB887	62.8355	5.26992	35.7433		#008000	30.1693	-49.9461	45.5971		#F0E68C	75.3579	-12.9277	51.4321		#FFEFD5	80.9053	-7.61916	22.4124		#800000	20.5689	32.5293	35.2359		#B0C4DE	64.7557	-9.41706	-8.29205		#7FFFD4	77.1791	-51.2179	16.0045		#E0FFFF	83.537	-20.9624	4.94098
69	35	攻	offence	7		#C0C0C0	66.0821	-8.95184	8.02328		#8B4513	25.1619	28.3096	41.3423		#00CED1	61.6628	-45.4061	-6.66954		#FFDEAD	75.7737	-1.65291	34.7722		#800080	24.7243	33.4803	-19.0905		#8FBC8F	57.1241	-25.0128	22.4475		#F0E68C	75.3579	-12.9277	51.4321		#FFA500	60.6933	24.0739	80.1479		#FFDEAD	75.7737	-1.65291	34.7722
70	35	守	defence	3		#A0522D	31.1538	30.8316	43.6932		#EEE8AA	76.4361	-12.8496	37.1633		#228B22	34.4431	-49.5638	48.3827		#DB7093	47.688	39.6582	6.89309		#800000	20.5689	32.5293	35.2359		#F5DEB3	75.0577	-5.45616	31.4243		#FFB6C1	67.0438	20.0549	10.9906		#DB7093	47.688	39.6582	6.89309		#DC143C	39.1904	55.3387	48.3634
71	36	愛	love	4		#DC143C	39.1904	55.3387	48.3634		#B22222	31.1304	46.0802	48.1965		#F08080	53.7287	39.2113	26.0244		#DC143C	39.1904	55.3387	48.3634		#DC143C	39.1904	55.3387	48.3634		#FFC0CB	69.5122	15.8496	9.45721		#DC143C	39.1904	55.3387	48.3634		#FF1493	48.323	65.0038	7.84701		#DC143C	39.1904	55.3387	48.3634
72	36	憎	hatred	7		#A0522D	31.1538	30.8316	43.6932		#8B4513	25.1619	28.3096	41.3423		#191970	9.98444	2.37775	-32.8712		#800080	24.7243	33.4803	-19.0905		#800080	24.7243	33.4803	-19.0905		#5F9EA0	46.6315	-24.5639	-3.26254		#4B0082	17.1269	18.9264	-32.91		#696969	31.7339	-0.632134	3.86271		#2F4F4F	14.8882	-6.92627	0.683732

## Sheet: Non-synaesthetes
Synaesthetic colour associations for Japanese Kanji characters: From the perspective of grapheme learning (Asano, Takahashi, Tsushiro, & Yokosawa)
Study 1 raw data and CIE L*a*b* coordinates
Non-synaesthetes (N = 16)						Non-syn 1					Non-syn 2					Non-syn 3					Non-syn 4					Non-syn 5					Non-syn 6					Non-syn 7					Non-syn 8					Non-syn 9
#	Antonym Pair #	Kanji	Meaning	Grade		Colour	L*	a*	b*		Colour	L*	a*	b*		Colour	L*	a*	b*		Colour	L*	a*	b*		Colour	L*	a*	b*		Colour	L*	a*	b*		Colour	L*	a*	b*		Colour	L*	a*	b*		Colour	L*	a*	b*
1	1	上	up	1		#ADD8E6	69.923	-20.5468	-3.82205		#C0C0C0	66.0821	-8.95184	8.02328		#DC143C	39.1904	55.3387	48.3634		#F0F8FF	82.8868	-12.6093	4.03951		#FFB6C1	67.0438	20.0549	10.9906		#2F4F4F	14.8882	-6.92627	0.683732		#87CEEB	65.7331	-25.5432	-13.2354		#FF0000	46.3517	63.5082	70.8424		#D8BFD8	66.2439	5.75064	-2.73763
2	1	下	down	1		#D3D3D3	72.9314	-10.3282	9.4853		#778899	41.5322	-6.5683	-7.01183		#0000FF	34.5858	25.3569	-75.0719		#BC8F8F	50.7106	14.1354	12.3561		#87CEFA	66.5886	-22.8658	-19.5932		#00BFFF	60.4002	-29.8128	-32.2501		#0000FF	34.5858	25.3569	-75.0719		#2F4F4F	14.8882	-6.92627	0.683732		#2F4F4F	14.8882	-6.92627	0.683732
3	2	右	right	1		#87CEFA	66.5886	-22.8658	-19.5932		#F0E68C	75.3579	-12.9277	51.4321		#7CFC00	72.9906	-65.6963	86.2479		#6495ED	49.9897	-4.83736	-39.8849		#FA8072	54.6058	39.7528	36.6284		#FFFF00	81.3575	-21.4548	96.6845		#EE82EE	58.2358	40.9938	-26.4892		#F0E68C	75.3579	-12.9277	51.4321		#00CED1	61.6628	-45.4061	-6.66954
4	2	左	left	1		#D2B48C	60.8522	0.483116	30.4443		#F0E68C	75.3579	-12.9277	51.4321		#DCDCDC	76.1796	-10.782	9.84554		#B1FF2F	76.1796	-51.1807	87.6899		#FFFACD	82.9984	-12.6094	28.9678		#FFA500	60.6933	24.0739	80.1479		#FF8C00	55.9574	35.705	76.8097		#8FBC8F	57.1241	-25.0128	22.4475		#1E90FF	48.6856	-6.47527	-51.5238
5	3	大	large	1		#DC143C	39.1904	55.3387	48.3634		#000000	0.997234	-0.0295737	0.225159		#FF0000	46.3517	63.5082	70.8424		#0000FF	34.5858	25.3569	-75.0719		#8A2BE2	37.205	39.1644	-55.5554		#FF69B4	53.75	53.4818	-2.56666		#808000	36.5876	-8.26467	54.4563		#DC143C	39.1904	55.3387	48.3634		#FFA500	60.6933	24.0739	80.1479
6	3	小	small	1		#DEB887	62.8355	5.26992	35.7433		#F5F5F5	84.7715	-11.8038	10.6174		#F0E68C	75.3579	-12.9277	51.4321		#8FBC8F	57.1241	-25.0128	22.4475		#1E90FF	48.6856	-6.47527	-51.5238		#FFFACD	82.9984	-12.6094	28.9678		#1E90FF	48.6856	-6.47527	-51.5238		#008080	33.2667	-29.4147	-5.78034		#1E90FF	48.6856	-6.47527	-51.5238
7	4	男	man	1		#0000FF	34.5858	25.3569	-75.0719		#0000CD	26.3002	21.4292	-62.3549		#0000FF	34.5858	25.3569	-75.0719		#1E90FF	48.6856	-6.47527	-51.5238		#000000	0.997234	-0.0295737	0.225159		#A9A9A9	57.5305	-7.8791	7.03519		#0000CD	26.3002	21.4292	-62.3549		#00008B	14.5518	11.9992	-42.9881		#2F4F4F	14.8882	-6.92627	0.683732
8	4	女	woman	1		#DB7093	47.688	39.6582	6.89309		#FF1493	48.323	65.0038	7.84701		#FF69B4	53.75	53.4818	-2.56666		#DC143C	39.1904	55.3387	48.3634		#DDA0DD	60.4448	23.2297	-14.5372		#FF69B4	53.75	53.4818	-2.56666		#DC143C	39.1904	55.3387	48.3634		#F08080	53.7287	39.2113	26.0244		#FF1493	48.323	65.0038	7.84701
9	5	天	heaven	1		#AFEEEE	75.8478	-29.0759	1.36849		#1E90FF	48.6856	-6.47527	-51.5238		#FFFAFA	87.0312	-10.5101	11.5396		#98FB98	75.2456	-51.2723	44.4159		#FFF0F5	81.6367	-4.80668	6.95209		#48D1CC	62.894	-43.6837	-2.00929		#87CEEB	65.7331	-25.5432	-13.2354		#FFE4B5	77.3585	-4.56802	33.7633		#FF8C00	55.9574	35.705	76.8097
10	5	地	earth	2		#808000	36.5876	-8.26467	54.4563		#D2691E	43.0332	38.2083	63.0975		#808000	36.5876	-8.26467	54.4563		#708090	38.2874	-3.53683	-7.33268		#8B0000	22.9475	36.0874	38.8733		#808000	36.5876	-8.26467	54.4563		#D2691E	43.0332	38.2083	63.0975		#808000	36.5876	-8.26467	54.4563		#A0522D	31.1538	30.8316	43.6932
11	6	朝	morning	2		#FF0000	46.3517	63.5082	70.8424		#FFB6C1	67.0438	20.0549	10.9906		#00BFFF	60.4002	-29.8128	-32.2501		#FFA500	60.6933	24.0739	80.1479		#FFA500	60.6933	24.0739	80.1479		#FFEBCD	79.7105	-5.65843	24.0035		#FFD700	71.893	-1.98598	88.9065		#F0E68C	75.3579	-12.9277	51.4321		#6495ED	49.9897	-4.83736	-39.8849
12	6	夕	evening	1		#FF6347	50.358	52.1791	55.2532		#E9967A	56.5257	25.1724	34.5081		#D2691E	43.0332	38.2083	63.0975		#FFA500	60.6933	24.0739	80.1479		#4682B4	39.1048	-11.2746	-26.9356		#FF8C00	55.9574	35.705	76.8097		#F4A460	59.9609	20.6214	53.3803		#D2691E	43.0332	38.2083	63.0975		#FFA500	60.6933	24.0739	80.1479
13	7	前	front	2		#708090	38.2874	-3.53683	-7.33268		#B1FF2F	76.1796	-51.1807	87.6899		#FF4500	47.3008	59.5017	71.3469		#F5F5F5	84.7715	-11.8038	10.6174		#FFA500	60.6933	24.0739	80.1479		#FFA500	60.6933	24.0739	80.1479		#FF0000	46.3517	63.5082	70.8424		#FF6347	50.358	52.1791	55.2532		#FF8C00	55.9574	35.705	76.8097
14	7	後	back	2		#556B2F	26.0662	-11.5018	17.1104		#8B008B	27.5482	34.4047	-20.7382		#008080	33.2667	-29.4147	-5.78034		#708090	38.2874	-3.53683	-7.33268		#87CEFA	66.5886	-22.8658	-19.5932		#AFEEEE	75.8478	-29.0759	1.36849		#4169E1	37.7165	11.2656	-54.3577		#483D8B	19.7288	16.6238	-34.4359		#483D8B	19.7288	16.6238	-34.4359
15	8	東	east	2		#4169E1	37.7165	11.2656	-54.3577		#0000FF	34.5858	25.3569	-75.0719		#1E90FF	48.6856	-6.47527	-51.5238		#1E90FF	48.6856	-6.47527	-51.5238		#F0E68C	75.3579	-12.9277	51.4321		#CD8541	47.8032	21.3447	53.7059		#FF6347	50.358	52.1791	55.2532		#CD8541	47.8032	21.3447	53.7059		#F5F5F5	84.7715	-11.8038	10.6174
16	8	西	west	2		#FFA07A	61.1942	26.8612	41.5299		#FFA500	60.6933	24.0739	80.1479		#FF7F50	54.2597	42.3519	55.019		#DC143C	39.1904	55.3387	48.3634		#00BFFF	60.4002	-29.8128	-32.2501		#32CD32	57.1436	-65.9743	66.9613		#00BFFF	60.4002	-29.8128	-32.2501		#2E8B57	35.5474	-41.2884	23.3312		#B0E0E6	72.0544	-23.4601	-0.453468
17	9	南	south	2		#FFA500	60.6933	24.0739	80.1479		#FF4500	47.3008	59.5017	71.3469		#00BFFF	60.4002	-29.8128	-32.2501		#8A2BE2	37.205	39.1644	-55.5554		#FFA500	60.6933	24.0739	80.1479		#FFA500	60.6933	24.0739	80.1479		#FF4500	47.3008	59.5017	71.3469		#F08080	53.7287	39.2113	26.0244		#00CED1	61.6628	-45.4061	-6.66954
18	9	北	north	2		#4682B4	39.1048	-11.2746	-26.9356		#FFF0F5	81.6367	-4.80668	6.95209		#F8F8FF	83.3318	-9.99841	4.75805		#20B2AA	51.6217	-42.3153	-1.17966		#B0E0E6	72.0544	-23.4601	-0.453468		#87CEFA	66.5886	-22.8658	-19.5932		#1E90FF	48.6856	-6.47527	-51.5238		#483D8B	19.7288	16.6238	-34.4359		#9400D3	36.4556	40.7674	-48.5466
19	10	強	strong	2		#DC143C	39.1904	55.3387	48.3634		#000000	0.997234	-0.0295737	0.225159		#8B0000	22.9475	36.0874	38.8733		#F0FFF0	83.9918	-17.4821	13.3773		#DC143C	39.1904	55.3387	48.3634		#CD8541	47.8032	21.3447	53.7059		#DC143C	39.1904	55.3387	48.3634		#FF6347	50.358	52.1791	55.2532		#1E90FF	48.6856	-6.47527	-51.5238
20	10	弱	weak	2		#FAFFFF	85.2	-12.7615	7.76606		#FFFFE0	84.7715	-14.1511	22.6039		#FFC0CB	69.5122	15.8496	9.45721		#EEE8AA	76.4361	-12.8496	37.1633		#48D1CC	62.894	-43.6837	-2.00929		#FF4500	47.3008	59.5017	71.3469		#4682B4	39.1048	-11.2746	-26.9356		#ADD8E6	69.923	-20.5468	-3.82205		#00FFFF	77.3943	-58.2714	-5.09969
21	11	春	spring	2		#FF69B4	53.75	53.4818	-2.56666		#7FFF00	73.9525	-65.9581	87.1469		#FFB6C1	67.0438	20.0549	10.9906		#B1FF2F	76.1796	-51.1807	87.6899		#FFC0CB	69.5122	15.8496	9.45721		#EE82EE	58.2358	40.9938	-26.4892		#FF69B4	53.75	53.4818	-2.56666		#FFC0CB	69.5122	15.8496	9.45721		#00FA9A	72.1951	-72.255	38.6622
22	11	秋	autumn	2		#CD8541	47.8032	21.3447	53.7059		#FFA500	60.6933	24.0739	80.1479		#FFA500	60.6933	24.0739	80.1479		#DC143C	39.1904	55.3387	48.3634		#FF8C00	55.9574	35.705	76.8097		#FA8072	54.6058	39.7528	36.6284		#CD8541	47.8032	21.3447	53.7059		#A0522D	31.1538	30.8316	43.6932		#FF8C00	55.9574	35.705	76.8097
23	12	夏	summer	2		#FF4500	47.3008	59.5017	71.3469		#32CD32	57.1436	-65.9743	66.9613		#40E0D0	67.1116	-51.7792	3.11538		#FF0000	46.3517	63.5082	70.8424		#00BFFF	60.4002	-29.8128	-32.2501		#FFD700	71.893	-1.98598	88.9065		#FFA500	60.6933	24.0739	80.1479		#FF4500	47.3008	59.5017	71.3469		#1E90FF	48.6856	-6.47527	-51.5238
24	12	冬	winter	2		#FFFFFF	88.2566	-12.3333	11.0834		#1E90FF	48.6856	-6.47527	-51.5238		#FFFAFA	87.0312	-10.5101	11.5396		#20B2AA	51.6217	-42.3153	-1.17966		#AFEEEE	75.8478	-29.0759	1.36849		#40E0D0	67.1116	-51.7792	3.11538		#4682B4	39.1048	-11.2746	-26.9356		#E6E6FA	77.81	-7.79844	-1.53183		#191970	9.98444	2.37775	-32.8712
25	13	昼	day	2		#FF8C00	55.9574	35.705	76.8097		#90EE90	71.1527	-49.1796	42.7212		#FFFF00	81.3575	-21.4548	96.6845		#FAFFFF	85.2	-12.7615	7.76606		#FFFF00	81.3575	-21.4548	96.6845		#FFEFD5	80.9053	-7.61916	22.4124		#FFFF00	81.3575	-21.4548	96.6845		#F5DEB3	75.0577	-5.45616	31.4243		#F0E68C	75.3579	-12.9277	51.4321
26	13	夜	night	2		#483D8B	19.7288	16.6238	-34.4359		#4B0082	17.1269	18.9264	-32.91		#2F4F4F	14.8882	-6.92627	0.683732		#483D8B	19.7288	16.6238	-34.4359		#6495ED	49.9897	-4.83736	-39.8849		#8A2BE2	37.205	39.1644	-55.5554		#00008B	14.5518	11.9992	-42.9881		#00008B	14.5518	11.9992	-42.9881		#FFFF00	81.3575	-21.4548	96.6845
27	14	生	alive	1		#98FB98	75.2456	-51.2723	44.4159		#FFFAFA	87.0312	-10.5101	11.5396		#32CD32	57.1436	-65.9743	66.9613		#00FF00	72.1147	-81.9901	84.7608		#006400	19.4784	-24.1588	22.2376		#00FA9A	72.1951	-72.255	38.6622		#FFFACD	82.9984	-12.6094	28.9678		#EEE8AA	76.4361	-12.8496	37.1633		#B1FF2F	76.1796	-51.1807	87.6899
28	14	死	dead	3		#696969	31.7339	-0.632134	3.86271		#DA70D6	51.5191	42.6174	-25.1892		#000000	0.997234	-0.0295737	0.225159		#696969	31.7339	-0.632134	3.86271		#A9A9A9	57.5305	-7.8791	7.03519		#778899	41.5322	-6.5683	-7.01183		#000000	0.997234	-0.0295737	0.225159		#000000	0.997234	-0.0295737	0.225159		#778899	41.5322	-6.5683	-7.01183
29	15	丸	round	2		#CD8541	47.8032	21.3447	53.7059		#FFFAFA	87.0312	-10.5101	11.5396		#FF4500	47.3008	59.5017	71.3469		#1E90FF	48.6856	-6.47527	-51.5238		#FF4500	47.3008	59.5017	71.3469		#D2691E	43.0332	38.2083	63.0975		#FF00FF	55.4106	62.9582	-40.0906		#DC143C	39.1904	55.3387	48.3634		#90EE90	71.1527	-49.1796	42.7212
30	15	角	anbular	2		#778899	41.5322	-6.5683	-7.01183		#00CED1	61.6628	-45.4061	-6.66954		#CD8541	47.8032	21.3447	53.7059		#E0FFFF	83.537	-20.9624	4.94098		#FFD700	71.893	-1.98598	88.9065		#FFFF00	81.3575	-21.4548	96.6845		#00CED1	61.6628	-45.4061	-6.66954		#6A5ACD	35.111	20.994	-47.5539		#B1FF2F	76.1796	-51.1807	87.6899
31	16	売	sell	2		#87CEFA	66.5886	-22.8658	-19.5932		#F8F8FF	83.3318	-9.99841	4.75805		#FFD700	71.893	-1.98598	88.9065		#7FFF00	73.9525	-65.9581	87.1469		#EEE8AA	76.4361	-12.8496	37.1633		#98FB98	75.2456	-51.2723	44.4159		#808000	36.5876	-8.26467	54.4563		#2E8B57	35.5474	-41.2884	23.3312		#DA70D6	51.5191	42.6174	-25.1892
32	16	買	buy	2		#FF1493	48.323	65.0038	7.84701		#FF1493	48.323	65.0038	7.84701		#FFD700	71.893	-1.98598	88.9065		#B0C4DE	64.7557	-9.41706	-8.29205		#DC143C	39.1904	55.3387	48.3634		#FFA500	60.6933	24.0739	80.1479		#C71585	37.6063	51.904	-1.03507		#778899	41.5322	-6.5683	-7.01183		#FFA500	60.6933	24.0739	80.1479
33	17	行	go	2		#B0C4DE	64.7557	-9.41706	-8.29205		#B1FF2F	76.1796	-51.1807	87.6899		#FFA500	60.6933	24.0739	80.1479		#FF4500	47.3008	59.5017	71.3469		#FFDAB9	75.3205	1.06049	27.8013		#AFEEEE	75.8478	-29.0759	1.36849		#FFFACD	82.9984	-12.6094	28.9678		#808000	36.5876	-8.26467	54.4563		#B0E0E6	72.0544	-23.4601	-0.453468
34	17	来	come	2		#FFD700	71.893	-1.98598	88.9065		#FFA500	60.6933	24.0739	80.1479		#FF6347	50.358	52.1791	55.2532		#DC143C	39.1904	55.3387	48.3634		#F0E68C	75.3579	-12.9277	51.4321		#FFFF00	81.3575	-21.4548	96.6845		#B1FF2F	76.1796	-51.1807	87.6899		#D2B48C	60.8522	0.483116	30.4443		#778899	41.5322	-6.5683	-7.01183
35	18	明	bright	2		#F5F5DC	81.6039	-13.1352	19.8325		#FF0000	46.3517	63.5082	70.8424		#FFFF00	81.3575	-21.4548	96.6845		#FF0000	46.3517	63.5082	70.8424		#F0E68C	75.3579	-12.9277	51.4321		#F4A460	59.9609	20.6214	53.3803		#FF8C00	55.9574	35.705	76.8097		#FF7F50	54.2597	42.3519	55.019		#FFFF00	81.3575	-21.4548	96.6845
36	18	暗	dark	3		#800080	24.7243	33.4803	-19.0905		#2F4F4F	14.8882	-6.92627	0.683732		#000000	0.997234	-0.0295737	0.225159		#191970	9.98444	2.37775	-32.8712		#20B2AA	51.6217	-42.3153	-1.17966		#000000	0.997234	-0.0295737	0.225159		#4B0082	17.1269	18.9264	-32.91		#2F4F4F	14.8882	-6.92627	0.683732		#191970	9.98444	2.37775	-32.8712
37	19	長	long	2		#6495ED	49.9897	-4.83736	-39.8849		#FF6347	50.358	52.1791	55.2532		#FF6347	50.358	52.1791	55.2532		#DC143C	39.1904	55.3387	48.3634		#7FFF00	73.9525	-65.9581	87.1469		#87CEFA	66.5886	-22.8658	-19.5932		#228B22	34.4431	-49.5638	48.3827		#6B8E23	38.9329	-25.3355	53.6066		#F0E68C	75.3579	-12.9277	51.4321
38	19	短	short	3		#6B8E23	38.9329	-25.3355	53.6066		#87CEFA	66.5886	-22.8658	-19.5932		#00BFFF	60.4002	-29.8128	-32.2501		#483D8B	19.7288	16.6238	-34.4359		#FFFFFF	88.2566	-12.3333	11.0834		#FFA500	60.6933	24.0739	80.1479		#00BFFF	60.4002	-29.8128	-32.2501		#FFA500	60.6933	24.0739	80.1479		#708090	38.2874	-3.53683	-7.33268
39	20	楽	easy, comfortable	2		#F4A460	59.9609	20.6214	53.3803		#FFFF00	81.3575	-21.4548	96.6845		#FFA500	60.6933	24.0739	80.1479		#DC143C	39.1904	55.3387	48.3634		#DDA0DD	60.4448	23.2297	-14.5372		#FF8C00	55.9574	35.705	76.8097		#F08080	53.7287	39.2113	26.0244		#FFD700	71.893	-1.98598	88.9065		#FFD700	71.893	-1.98598	88.9065
40	20	苦	hard	3		#008B8B	37.5338	-34.3626	-5.20202		#808000	36.5876	-8.26467	54.4563		#556B2F	26.0662	-11.5018	17.1104		#556B2F	26.0662	-11.5018	17.1104		#9932CC	36.6252	40.4498	-44.3274		#DAA520	56.2277	10.8581	73.4514		#483D8B	19.7288	16.6238	-34.4359		#556B2F	26.0662	-11.5018	17.1104		#800000	20.5689	32.5293	35.2359
41	21	教	teach	2		#DAA520	56.2277	10.8581	73.4514		#48D1CC	62.894	-43.6837	-2.00929		#778899	41.5322	-6.5683	-7.01183		#20B2AA	51.6217	-42.3153	-1.17966		#D2B48C	60.8522	0.483116	30.4443		#FFD700	71.893	-1.98598	88.9065		#008B8B	37.5338	-34.3626	-5.20202		#D2691E	43.0332	38.2083	63.0975		#FFA500	60.6933	24.0739	80.1479
42	21	習	learn	3		#48D1CC	62.894	-43.6837	-2.00929		#FFFAFA	87.0312	-10.5101	11.5396		#1E90FF	48.6856	-6.47527	-51.5238		#4169E1	37.7165	11.2656	-54.3577		#FFFF00	81.3575	-21.4548	96.6845		#FFEFD5	80.9053	-7.61916	22.4124		#FF8C00	55.9574	35.705	76.8097		#4B0082	17.1269	18.9264	-32.91		#1E90FF	48.6856	-6.47527	-51.5238
43	22	高	high	2		#4169E1	37.7165	11.2656	-54.3577		#FA8072	54.6058	39.7528	36.6284		#FFFF00	81.3575	-21.4548	96.6845		#00FFFF	77.3943	-58.2714	-5.09969		#6495ED	49.9897	-4.83736	-39.8849		#F4A460	59.9609	20.6214	53.3803		#FF0000	46.3517	63.5082	70.8424		#EEE8AA	76.4361	-12.8496	37.1633		#FF4500	47.3008	59.5017	71.3469
44	22	低	low	4		#FFE4B5	77.3585	-4.56802	33.7633		#40E0D0	67.1116	-51.7792	3.11538		#00008B	14.5518	11.9992	-42.9881		#F0FFF0	83.9918	-17.4821	13.3773		#4682B4	39.1048	-11.2746	-26.9356		#87CEFA	66.5886	-22.8658	-19.5932		#00CED1	61.6628	-45.4061	-6.66954		#4682B4	39.1048	-11.2746	-26.9356		#708090	38.2874	-3.53683	-7.33268
45	23	深	deep	3		#191970	9.98444	2.37775	-32.8712		#191970	9.98444	2.37775	-32.8712		#191970	9.98444	2.37775	-32.8712		#191970	9.98444	2.37775	-32.8712		#7B68EE	42.3994	21.1097	-52.908		#DDA0DD	60.4448	23.2297	-14.5372		#008000	30.1693	-49.9461	45.5971		#556B2F	26.0662	-11.5018	17.1104		#000080	13.0216	7.86157	-39.8492
46	23	浅	shallow	4		#FFE4B5	77.3585	-4.56802	33.7633		#AFEEEE	75.8478	-29.0759	1.36849		#00FFFF	77.3943	-58.2714	-5.09969		#B0E0E6	72.0544	-23.4601	-0.453468		#00BFFF	60.4002	-29.8128	-32.2501		#40E0D0	67.1116	-51.7792	3.11538		#90EE90	71.1527	-49.1796	42.7212		#B0E0E6	72.0544	-23.4601	-0.453468		#E6E6FA	77.81	-7.79844	-1.53183
47	24	喜	happy	4		#C71585	37.6063	51.904	-1.03507		#FFD700	71.893	-1.98598	88.9065		#FF0000	46.3517	63.5082	70.8424		#DC143C	39.1904	55.3387	48.3634		#FFC0CB	69.5122	15.8496	9.45721		#FF6347	50.358	52.1791	55.2532		#00FFFF	77.3943	-58.2714	-5.09969		#FFFF00	81.3575	-21.4548	96.6845		#FFFF00	81.3575	-21.4548	96.6845
48	24	悲	sad	3		#483D8B	19.7288	16.6238	-34.4359		#191970	9.98444	2.37775	-32.8712		#000080	13.0216	7.86157	-39.8492		#483D8B	19.7288	16.6238	-34.4359		#87CEFA	66.5886	-22.8658	-19.5932		#00CED1	61.6628	-45.4061	-6.66954		#800080	24.7243	33.4803	-19.0905		#778899	41.5322	-6.5683	-7.01183		#00008B	14.5518	11.9992	-42.9881
49	25	新	new	2		#F8F8FF	83.3318	-9.99841	4.75805		#DC143C	39.1904	55.3387	48.3634		#FFFAFA	87.0312	-10.5101	11.5396		#FFFFFF	88.2566	-12.3333	11.0834		#F5FFFA	84.6792	15.5974	22.2249		#FFA500	60.6933	24.0739	80.1479		#C71585	37.6063	51.904	-1.03507		#F5F5F5	84.7715	-11.8038	10.6174		#FFFF00	81.3575	-21.4548	96.6845
50	25	旧	old	5		#FAFAD2	82.743	-13.9583	25.9684		#808080	41.4062	-3.02351	5.4047		#556B2F	26.0662	-11.5018	17.1104		#708090	38.2874	-3.53683	-7.33268		#DDA0DD	60.4448	23.2297	-14.5372		#7FFFD4	77.1791	-51.2179	16.0045		#8B4513	25.1619	28.3096	41.3423		#556B2F	26.0662	-11.5018	17.1104		#7B68EE	42.3994	21.1097	-52.908
51	26	有	present	3		#B22222	31.1304	46.0802	48.1965		#FF8C00	55.9574	35.705	76.8097		#D3D3D3	72.9314	-10.3282	9.4853		#0000CD	26.3002	21.4292	-62.3549		#DC143C	39.1904	55.3387	48.3634		#B22222	31.1304	46.0802	48.1965		#FF4500	47.3008	59.5017	71.3469		#DC143C	39.1904	55.3387	48.3634		#FAFFFF	85.2	-12.7615	7.76606
52	26	無	absent	4		#ADD8E6	69.923	-20.5468	-3.82205		#696969	31.7339	-0.632134	3.86271		#FFFAFA	87.0312	-10.5101	11.5396		#A9A9A9	57.5305	-7.8791	7.03519		#0000CD	26.3002	21.4292	-62.3549		#1E90FF	48.6856	-6.47527	-51.5238		#ADD8E6	69.923	-20.5468	-3.82205		#778899	41.5322	-6.5683	-7.01183		#FFFAFA	87.0312	-10.5101	11.5396
53	27	公	public	2		#FAFAD2	82.743	-13.9583	25.9684		#00FF00	72.1147	-81.9901	84.7608		#00FF7F	72.9511	-75.8178	53.3128		#00CED1	61.6628	-45.4061	-6.66954		#FFC0CB	69.5122	15.8496	9.45721		#FFFF00	81.3575	-21.4548	96.6845		#FF7F50	54.2597	42.3519	55.019		#FFFF00	81.3575	-21.4548	96.6845		#000000	0.997234	-0.0295737	0.225159
54	27	私	private	6		#FFB6C1	67.0438	20.0549	10.9906		#87CEFA	66.5886	-22.8658	-19.5932		#FF69B4	53.75	53.4818	-2.56666		#DC143C	39.1904	55.3387	48.3634		#DAA520	56.2277	10.8581	73.4514		#FF0000	46.3517	63.5082	70.8424		#FF69B4	53.75	53.4818	-2.56666		#708090	38.2874	-3.53683	-7.33268		#FAFFFF	85.2	-12.7615	7.76606
55	28	官	government	4		#FFFFF0	85.337	-12.679	15.4136		#000000	0.997234	-0.0295737	0.225159		#A9A9A9	57.5305	-7.8791	7.03519		#2F4F4F	14.8882	-6.92627	0.683732		#7B68EE	42.3994	21.1097	-52.908		#778899	41.5322	-6.5683	-7.01183		#8B008B	27.5482	34.4047	-20.7382		#2E8B57	35.5474	-41.2884	23.3312		#6A5ACD	35.111	20.994	-47.5539
56	28	民	nongovernment, private	4		#1E90FF	48.6856	-6.47527	-51.5238		#1E90FF	48.6856	-6.47527	-51.5238		#FFD700	71.893	-1.98598	88.9065		#FF8C00	55.9574	35.705	76.8097		#3CB371	49.882	-48.8294	28.5082		#FAFFFF	85.2	-12.7615	7.76606		#808000	36.5876	-8.26467	54.4563		#DEB887	62.8355	5.26992	35.7433		#32CD32	57.1436	-65.9743	66.9613
57	29	得	gain	4		#40E0D0	67.1116	-51.7792	3.11538		#DC143C	39.1904	55.3387	48.3634		#FFD700	71.893	-1.98598	88.9065		#B1FF2F	76.1796	-51.1807	87.6899		#FFD700	71.893	-1.98598	88.9065		#9400D3	36.4556	40.7674	-48.5466		#1E90FF	48.6856	-6.47527	-51.5238		#FFFF00	81.3575	-21.4548	96.6845		#FFD700	71.893	-1.98598	88.9065
58	29	損	loss	5		#8A2BE2	37.205	39.1644	-55.5554		#191970	9.98444	2.37775	-32.8712		#000000	0.997234	-0.0295737	0.225159		#3CB371	49.882	-48.8294	28.5082		#708090	38.2874	-3.53683	-7.33268		#40E0D0	67.1116	-51.7792	3.11538		#5F9EA0	46.6315	-24.5639	-3.26254		#00008B	14.5518	11.9992	-42.9881		#DC143C	39.1904	55.3387	48.3634
59	30	善	virtuous	6		#DDA0DD	60.4448	23.2297	-14.5372		#FF8C00	55.9574	35.705	76.8097		#FFFAFA	87.0312	-10.5101	11.5396		#FFE4E1	79.2596	-1.55841	13.6295		#F5DEB3	75.0577	-5.45616	31.4243		#FFA500	60.6933	24.0739	80.1479		#FF1493	48.323	65.0038	7.84701		#FFC0CB	69.5122	15.8496	9.45721		#1E90FF	48.6856	-6.47527	-51.5238
60	30	悪	evil	3		#4B0082	17.1269	18.9264	-32.91		#191970	9.98444	2.37775	-32.8712		#000000	0.997234	-0.0295737	0.225159		#4B0082	17.1269	18.9264	-32.91		#BA55D3	43.9447	42.5809	-36.0864		#696969	31.7339	-0.632134	3.86271		#4B0082	17.1269	18.9264	-32.91		#708090	38.2874	-3.53683	-7.33268		#800080	24.7243	33.4803	-19.0905
61	31	貸	lend	5		#7B68EE	42.3994	21.1097	-52.908		#FAFFFF	85.2	-12.7615	7.76606		#696969	31.7339	-0.632134	3.86271		#708090	38.2874	-3.53683	-7.33268		#FF1493	48.323	65.0038	7.84701		#FF00FF	55.4106	62.9582	-40.0906		#00FA9A	72.1951	-72.255	38.6622		#FFDAB9	75.3205	1.06049	27.8013		#0000FF	34.5858	25.3569	-75.0719
62	31	借	borrow	4		#00CED1	61.6628	-45.4061	-6.66954		#1E90FF	48.6856	-6.47527	-51.5238		#FFD700	71.893	-1.98598	88.9065		#228B22	34.4431	-49.5638	48.3827		#00BFFF	60.4002	-29.8128	-32.2501		#F4A460	59.9609	20.6214	53.3803		#7FFFD4	77.1791	-51.2179	16.0045		#778899	41.5322	-6.5683	-7.01183		#B1FF2F	76.1796	-51.1807	87.6899
63	32	富	rich	5		#7CFC00	72.9906	-65.6963	86.2479		#FFFF00	81.3575	-21.4548	96.6845		#FFD700	71.893	-1.98598	88.9065		#D2691E	43.0332	38.2083	63.0975		#ADD8E6	69.923	-20.5468	-3.82205		#7FFFD4	77.1791	-51.2179	16.0045		#1E90FF	48.6856	-6.47527	-51.5238		#FFD700	71.893	-1.98598	88.9065		#F0E68C	75.3579	-12.9277	51.4321
64	32	貧	poor	5		#708090	38.2874	-3.53683	-7.33268		#C0C0C0	66.0821	-8.95184	8.02328		#A9A9A9	57.5305	-7.8791	7.03519		#800000	20.5689	32.5293	35.2359		#E6E6FA	77.81	-7.79844	-1.53183		#F0E68C	75.3579	-12.9277	51.4321		#191970	9.98444	2.37775	-32.8712		#556B2F	26.0662	-11.5018	17.1104		#4B0082	17.1269	18.9264	-32.91
65	33	老	elderly	4		#BDB76B	58.6396	-10.7942	44.9077		#A9A9A9	57.5305	-7.8791	7.03519		#556B2F	26.0662	-11.5018	17.1104		#708090	38.2874	-3.53683	-7.33268		#808000	36.5876	-8.26467	54.4563		#FFD700	71.893	-1.98598	88.9065		#808000	36.5876	-8.26467	54.4563		#808000	36.5876	-8.26467	54.4563		#483D8B	19.7288	16.6238	-34.4359
66	33	若	young	6		#66CDAF	61.168	-41.8581	11.0065		#FF6347	50.358	52.1791	55.2532		#7FFFD4	77.1791	-51.2179	16.0045		#00FF00	72.1147	-81.9901	84.7608		#FF69B4	53.75	53.4818	-2.56666		#FF69B4	53.75	53.4818	-2.56666		#7CFC00	72.9906	-65.6963	86.2479		#EEE8AA	76.4361	-12.8496	37.1633		#40E0D0	67.1116	-51.7792	3.11538
67	34	送	see off	3		#87CEEB	65.7331	-25.5432	-13.2354		#4169E1	37.7165	11.2656	-54.3577		#FF4500	47.3008	59.5017	71.3469		#D8BFD8	66.2439	5.75064	-2.73763		#FFD700	71.893	-1.98598	88.9065		#FFD700	71.893	-1.98598	88.9065		#32CD32	57.1436	-65.9743	66.9613		#4682B4	39.1048	-11.2746	-26.9356		#48D1CC	62.894	-43.6837	-2.00929
68	34	迎	go out to meet	7		#F8F8FF	83.3318	-9.99841	4.75805		#DC143C	39.1904	55.3387	48.3634		#FF4500	47.3008	59.5017	71.3469		#FF8C00	55.9574	35.705	76.8097		#FFEFD5	80.9053	-7.61916	22.4124		#40E0D0	67.1116	-51.7792	3.11538		#2E8B57	35.5474	-41.2884	23.3312		#F0E68C	75.3579	-12.9277	51.4321		#FFD700	71.893	-1.98598	88.9065
69	35	攻	offence	7		#8B4513	25.1619	28.3096	41.3423		#A52A2A	28.6504	42.2311	42.1005		#FF0000	46.3517	63.5082	70.8424		#DC143C	39.1904	55.3387	48.3634		#FFFF00	81.3575	-21.4548	96.6845		#FF0000	46.3517	63.5082	70.8424		#FF1493	48.323	65.0038	7.84701		#800000	20.5689	32.5293	35.2359		#FF4500	47.3008	59.5017	71.3469
70	35	守	defence	3		#DB7093	47.688	39.6582	6.89309		#1E90FF	48.6856	-6.47527	-51.5238		#F08080	53.7287	39.2113	26.0244		#FA8072	54.6058	39.7528	36.6284		#FF8C00	55.9574	35.705	76.8097		#FFD700	71.893	-1.98598	88.9065		#48D1CC	62.894	-43.6837	-2.00929		#006400	19.4784	-24.1588	22.2376		#0000CD	26.3002	21.4292	-62.3549
71	36	愛	love	4		#A52A2A	28.6504	42.2311	42.1005		#FFA07A	61.1942	26.8612	41.5299		#DC143C	39.1904	55.3387	48.3634		#F08080	53.7287	39.2113	26.0244		#FF00FF	55.4106	62.9582	-40.0906		#FF7F50	54.2597	42.3519	55.019		#FF69B4	53.75	53.4818	-2.56666		#FF69B4	53.75	53.4818	-2.56666		#FF4500	47.3008	59.5017	71.3469
72	36	憎	hatred	7		#483D8B	19.7288	16.6238	-34.4359		#00008B	14.5518	11.9992	-42.9881		#000000	0.997234	-0.0295737	0.225159		#8B0000	22.9475	36.0874	38.8733		#8FBC8F	57.1241	-25.0128	22.4475		#FF6347	50.358	52.1791	55.2532		#483D8B	19.7288	16.6238	-34.4359		#4B0082	17.1269	18.9264	-32.91		#FF4500	47.3008	59.5017	71.3469
